# Supplementary material
Source: PubMed Central journal article supplement (PMC3905242)
Supplement: NIHMS548067-supplement-supp_data1.pdf [file NIHMS548067-supplement-supp_data1.pdf]

Supplementary information S1 (table) | **Genetic interactions with Mre11 complex alleles in the mouse.**

The Mre11 complex mutation and second mutated locus are listed in the first and second columns. A brief phenotypic summary is provided in the third followed by the corresponding reference(s).

| Locus 1                                                               | Locus 2                             | Phenotypes                                                                                                                                             | Refs |
|-----------------------------------------------------------------------|-------------------------------------|--------------------------------------------------------------------------------------------------------------------------------------------------------|------|
| <i>Nbs1</i> <sup>ΔB/ΔB</sup><br><i>Nbn</i> <sup>tm1Jpt</sup>          | <i>p53</i> <sup>-/-</sup>           | Reduced latency of lymphoma onset and reduced survival.                                                                                                | 1    |
| <i>Nbs1</i> <sup>ΔB/ΔB</sup>                                          | <i>p53</i> <sup>+/-</sup>           | Reduced latency of tumor onset and reduced survival.                                                                                                   | 1    |
| <i>Nbs1</i> <sup>ΔB/ΔB</sup>                                          | <i>Atm</i> <sup>-/-</sup>           | Synthetic lethality.                                                                                                                                   | 1    |
| <i>Nbs1</i> <sup>ΔB/ΔB</sup>                                          | <i>Mre11</i> <sup>ATLD1/ATLD1</sup> | Synthetic lethality.                                                                                                                                   | 2    |
| <i>Nbs1</i> <sup>ΔB/ΔB</sup>                                          | <i>Chk2</i> <sup>-/-</sup>          | Broad spectrum late onset tumorigenesis.<br>Enhanced intra-S phase checkpoint defect.                                                                  | 3    |
| <i>Nbs1</i> <sup>ΔB/ΔB</sup>                                          | <i>Prkdc</i> <sup>scid/scid</sup>   | Synthetic lethality (incomplete penetrance).<br>Severe runting and shortened lifespan.<br>Chromosomal instability and increased radiation sensitivity. | 4    |
| <i>Nbs1</i> <sup>ΔB/ΔB</sup>                                          | <i>Rad54</i> <sup>-/-</sup>         | Synthetic lethality (incomplete penetrance).<br>Severe runting and shortened lifespan.<br>Chromosomal instability and increased radiation sensitivity. | 5    |
| <i>Nbs1</i> <sup>ΔB/ΔB</sup>                                          | <i>Art</i> <sup>-/-</sup>           | No overt synthetic phenotypes.                                                                                                                         | 4    |
| <i>Nbs1</i> <sup>ΔB/ΔB</sup>                                          | <i>Smc1</i> <sup>2SA/2SA</sup>      | No overt synthetic phenotypes.                                                                                                                         | 4    |
| <i>Nbs1</i> <sup>m/m</sup><br><i>Nbn</i> <sup>tm1Xu</sup>             | <i>H2AX</i> <sup>-/-</sup>          | Synthetic lethality.                                                                                                                                   | 6    |
| <i>Nbs1</i> <sup>m/m</sup>                                            | <i>p53</i> <sup>-/-</sup>           | Reduced latency of lymphoma onset.                                                                                                                     | 6    |
| <i>hNbs1</i> <sup>tr735/tr735</sup>                                   | <i>53BP1</i> <sup>-/-</sup>         | Enhanced TCR and IgH associated metaphase abnormalities.                                                                                               | 7    |
| <i>Mre11</i> <sup>ATLD1/ATLD1</sup><br><i>Mre11</i> <sup>tm1Jpt</sup> | <i>p53</i> <sup>-/-</sup>           | Reduced latency of lymphoma onset and reduced survival.                                                                                                | 2    |
| <i>Mre11</i> <sup>ATLD1/ATLD1</sup>                                   | <i>p53</i> <sup>+/-</sup>           | Reduced latency of tumor onset and reduced survival.                                                                                                   | 2    |
| <i>Mre11</i> <sup>ATLD1/ATLD1</sup>                                   | <i>Chk2</i> <sup>-/-</sup>          | Heterogenous late onset tumorigenesis.<br>Enhanced apoptotic defect.                                                                                   | 3    |
| <i>Mre11</i> <sup>ATLD1/ATLD1</sup>                                   | <i>Nbs1</i> <sup>ΔB/ΔB</sup>        | Synthetic lethality.                                                                                                                                   | 2    |
| <i>Mre11</i> <sup>ATLD1/ATLD1</sup>                                   | <i>Atm</i> <sup>-/-</sup>           | Synthetic lethality.                                                                                                                                   | 2    |
| <i>Mre11</i> <sup>ATLD1/ATLD1</sup>                                   | <i>Prkdc</i> <sup>scid/scid</sup>   | Synthetic lethality.                                                                                                                                   | 4    |
| <i>Mre11</i> <sup>ATLD1/ATLD1</sup>                                   | <i>Lig4</i> <sup>-/-</sup>          | Reduced neuronal apoptosis (with conditional nestin-Lig4 allele).<br>Embryonic lethality.                                                              | 8    |
| <i>Rad50</i> <sup>S/S</sup><br><i>Rad50</i> <sup>tm2Jpt</sup>         | <i>p53</i> <sup>-/-</sup>           | Decreased haematopoietic stem cell (HSC) attrition, abrogation of anemia.<br>Reduced tumor latency.                                                    | 9    |
| <i>Rad50</i> <sup>S/S</sup>                                           | <i>p53</i> <sup>+/-</sup>           | Decreased HSC attrition, abrogation of anemia.<br>Reduced tumor latency.                                                                               | 9    |
| <i>Rad50</i> <sup>S/S</sup>                                           | <i>Atm</i> <sup>-/-</sup>           | Decreased HSC attrition, enhanced survival.<br>Increased latency of lymphoma.<br>Improved cell growth.                                                 | 10   |
| <i>Rad50</i> <sup>S/S</sup>                                           | <i>Chk2</i> <sup>-/-</sup>          | Decreased HSC attrition, enhanced survival.<br>Late onset lymphoma.                                                                                    | 10   |
| <i>Rad50</i> <sup>S/S</sup>                                           | <i>Mre11</i> <sup>+//ATLD1</sup>    | Decreased HSC attrition, enhanced survival.<br>Increased tumorigenesis and reduced anemia.                                                             | 10   |
| <i>Rad50</i> <sup>S/S</sup>                                           | <i>Mre11</i> <sup>ATLD1/ATLD1</sup> | Decreased HSC attrition, enhanced survival.<br>Increased latency of lymphoma.                                                                          | 10   |
| <i>Rad50</i> <sup>S/S</sup>                                           | <i>Nbs1</i> <sup>+//ΔB</sup>        | Decreased HSC attrition, enhanced survival.                                                                                                            | 10   |
| <i>Rad50</i> <sup>S/S</sup>                                           | <i>Nbs1</i> <sup>ΔB/ΔB</sup>        | Decreased HSC attrition, enhanced survival.                                                                                                            | 10   |
| <i>Rad50</i> <sup>S/S</sup>                                           | <i>Smc1</i> <sup>2SA/2SA</sup>      | No overt synthetic phenotypes.                                                                                                                         | 10   |
| <i>Rad50</i> <sup>S/S</sup>                                           | <i>Eμ-Bcl2 transgene</i>            | Decreased HSC attrition, enhanced survival.                                                                                                            | 10   |
| <i>Rad50</i> <sup>S/S</sup>                                           | <i>Nbs1</i> <sup>ΔC/ΔC</sup>        | Decreased HSC attrition, enhanced survival.<br>Abrogation of anemia and tumorigenesis.                                                                 | 11   |
| <i>Rad50</i> <sup>S/S</sup>                                           | <i>p21</i> <sup>-/-</sup>           | Enhanced survival.                                                                                                                                     | 12   |
| <i>Rad50</i> <sup>S/S</sup>                                           | <i>p27</i> <sup>-/-</sup>           | Enhanced survival.<br>Increased bone marrow CFCs.                                                                                                      | 12   |
| <i>Rad50</i> <sup>S/S</sup>                                           | <i>MEF</i> <sup>-/-</sup>           | Enhanced survival.<br>Increased G0 LSK cells in bone marrow and reduced apoptosis.                                                                     | 12   |

## SUPPLEMENTARY INFORMATION

1. Williams, B. R. *et al.* A murine model of nijmegen breakage syndrome. *Curr Biol* **12**, 648-653, (2002).
2. Theunissen, J. W. *et al.* Checkpoint failure and chromosomal instability without lymphomagenesis in Mre11 (ATLD1/ATLD1) mice. *Mol Cell* **12**, 1511-1523, (2003).
3. Stracker, T. H., Couto, S. S., Cordon-Cardo, C., Matos, T. & Petrini, J. H. Chk2 suppresses the oncogenic potential of DNA replication-associated DNA damage. *Mol Cell* **31**, 21-32, (2008).
4. Stracker, T. H. *et al.* Artemis and nonhomologous end joining-independent influence of DNA-dependent protein kinase catalytic subunit on chromosome stability. *Mol Cell Biol* **29**, 503-514, (2009).
5. Brugmans, L. *et al.* NBS1 cooperates with homologous recombination to counteract chromosome breakage during replication. *DNA Repair (Amst)* **8**, 1363-1370, (2009).
6. Kang, J. *et al.* Functional Interaction of H2AX, NBS1, and p53 in ATM-Dependent DNA Damage Responses and Tumor Suppression. *Mol Cell Biol* **25**, 661-670, (2005).
7. Difilippantonio, S. *et al.* 53BP1 facilitates long-range DNA end-joining during V(D)J recombination. *Nature* **456**, 529-533, (2008).
8. Shull, E. R. *et al.* Differential DNA damage signaling accounts for distinct neural apoptotic responses in ATLD and NBS. *Genes Dev* **23**, 171-180, (2009).
9. Bender, C. F. *et al.* Cancer predisposition and hematopoietic failure in Rad50(S/S) mice. *Genes Dev* **16**, 2237-2251, (2002).
10. Morales, M. *et al.* The Rad50S allele promotes ATM-dependent DNA damage responses and suppresses ATM deficiency: implications for the Mre11 complex as a DNA damage sensor. *Genes Dev* **19**, 3043-3054, (2005).
11. Stracker, T. H., Morales, M., Couto, S. S., Hussein, H. & Petrini, J. H. The carboxy terminus of NBS1 is required for induction of apoptosis by the MRE11 complex. *Nature* **447**, 218-221, (2007).
12. Morales, M. *et al.* DNA damage signaling in hematopoietic cells: a role for Mre11 complex repair of topoisomerase lesions. *Cancer Res* **68**, 2186-2193, (2008).
